# Supplementary material for: In silico functional annotation of hypothetical proteins from the Bacillus paralicheniformis strain Bac84 reveals proteins with biotechnological potentials and adaptational functions to extreme environments
Source: PLoS One. 2022 Oct 13;17(10):e0276085. doi: 10.1371/journal.pone.0276085 (PMC9560612; doi:10.1371/journal.pone.0276085)
Supplement: S3 Table — (XLSX) [file pone.0276085.s008.xlsx]

## Sheet: Functional analysis
Supplementary Table S3 : Annotation dataset results for the 414 hypothetical proteins submitted to the workflow with Pfam, InterPro, CATH, SUPERFAMILY, ScanProsite, SMART and CDD-Blast.
No	Protein ID	Pfam	InterPro	CATH	SUPERFAMILY	ScanProsite	SMART	CDD-Blast	Predicted Domain/Function
1	WP_228767678.1	No results	No results	No results	No results	No results	No results	No results	None
2	WP_234026581.1	No results	No results	No results	No results	No results	No results	No results	None
3	WP_009328007.1	No results	No results	No results	No results	No results	No results	No results	None
4	WP_020453406.1	No results	No results	No results	No results	No results	No results	No results	None
5	WP_023857319.1	No results	No results	No results	No results	No results	No results	No results	None
6	WP_020450851.1	No results	No results	No results	No results	No results	Trnasmembrane region	No results	None
7	WP_020451800.1	No results	No results	No results	No results	No results	No results	No results	None
8	WP_023856733.1	No results	No results	No results	No results	No results	No results	No results	None
9	WP_023857374.1	No results	No results	No results	No results	No results	No results	No results	None
10	WP_020451847.1	No results	No results	No results	No results	No results	Trnasmembrane region	No results	None
11	WP_153247060.1	No results	No results	No results	No results	No results	No results	No results	None
12	WP_023856549.1	No results	No results	No results	No results	No results	Trnasmembrane region	No results	None
13	WP_095290311.1	No results	No results	No results	No results	No results	No results	No results	None
14	WP_155266823.1	No results	No results	No results	No results	No results	No results	No results	None
15	WP_158700706.1	Urease_alpha	Metal-dep_hydrolase_composite Urease_alpha_N_dom	No results	Composite domain of metallo-dependent hydrolases	No results	No results	PRK09060 super family dihydroorotase	Metal-dependent hydrolase, composite domain superfamily
16	WP_023857161.1	No results	No results	No results	No results	No results	Trnasmembrane region	No results	None
17	WP_023857015.1	No results	No results	No results	No results	No results	Trnasmembrane region	No results	None
18	WP_020453636.1	No results	No results	No results	No results	No results	Trnasmembrane region	No results	None
19	WP_003180548.1	No results	No results	No results	No results	No results	No results	No results	None
20	WP_023857597.1	No results	No results	No results	No results	No results	Trnasmembrane region	No results	None
21	WP_165688282.1	No results	No results	No results	No results	No results	No results	No results	None
22	WP_020452574.1	No results	No results	No results	No results	No results	No results	No results	None
23	WP_021837703.1	No results	No results	No results	No results	No results	No results	No results	None
24	WP_020453188.1	No results	No results	No results	No results	No results	No results	No results	None
25	WP_020451158.1	No results	No results	No results	No results	No results	No results	No results	None
26	WP_165395385.1	No results	No results	No results	No results	No results	No results	No results	None
27	WP_164468295.1	No results	No results	No results	No results	No results	No results	No results	None
28	WP_020451198.1	No results	No results	No results	Transcriptional factor domain	No results	No results	SIR2 superfamily of proteins includes silent information regulator 2 (Sir2) enzymes	None
29	WP_003182852.1	No results	No results	No results	No results	No results	No results	No results	None
30	WP_164468298.1	No results	No results	No results	No results	No results	No results	No results	None
31	WP_164468297.1	No results	No results	No results	No results	No results	No results	No results	None
32	WP_023856286.1	No results	No results	No results	No results	No results	Trnasmembrane region	No results	None
33	WP_164468296.1	No results	No results	No results	No results	No results	Trnasmembrane region	No results	None
34	WP_164943111.1	No results	No results	No results	No results	No results	No results	No results	None
35	WP_026580436.1	No results	No results	No results	No results	No results	Trnasmembrane region	No results	None
36	WP_020450539.1	No results	No results	No results	No results	No results	Transmembrane region	No results	None
37	WP_020451115.1	No results	No results	No results	No results	No results	No results	No results	None
38	WP_023857627.1	No results	No results	No results	No results	No results	Transmembrane region	No results	None
39	WP_023855260.1	No results	No results	No results	No results	No results	Transmembrane region	No results	None
40	WP_228767692.1	No results	No results	No results	No results	No results	No results	hypothetical protein; Provisional	None
41	WP_165389270.1	No results	No results	No results	No results	No results	Transmembrane region	No results	None
42	WP_230368348.1	No results	DNA_brk_join_enz Integrase-like_cat_sf	No results	DNA breaking-rejoining enzymes	No results	No results	DNA breaking-rejoining enzymes, C-terminal catalytic domain	DNA breaking-rejoining enzymes, C-terminal catalytic domain
43	WP_165583461.1	No results	No results	No results	No results	No results	No results	No results	None
44	WP_020453503.1	No results	No results	No results	No results	No results	No results	No results	None
45	WP_158700709.1	No results	No results	No results	No results	No results	No results	No results	None
46	WP_153247050.1	No results	No results	No results	No results	No results	Transmembrane region	No results	None
47	WP_020451723.1	No results	No results	No results	No results	No results	No results	No results	None
48	WP_023856228.1	No results	No results	No results	No results	No results	No results	No results	None
49	WP_023856663.1	No results	No results	No results	No results	No results	Transmembrane region	No results	None
50	WP_023857159.1	No results	No results	No results	No results	No results	Transmembrane region	No results	None
51	WP_023855671.1	No results	No results	No results	No results	No results	No results	No results	None
52	WP_165395376.1	No results	No results	No results	No results	No results	No results	No results	None
53	WP_199792114.1	No results	No results	No results	DnaJ/Hsp40 cysteine-rich domain	No results	Transmembrane region	No results	None
54	WP_023856975.1	No results	No results	No results	No results	No results	No results	No results	None
55	WP_020451569.1	No results	No results	No results	Multidrug resistance efflux transporter EmrE	No results	Transmembrane region	No results	None
56	WP_020452191.1	No results	No results	No results	No results	No results	Transmembrane region	No results	None
57	WP_020452736.1	No results	No results	No results	No results	No results	Transmembrane region	No results	None
58	WP_026579630.1	No results	No results	No results	No results	No results	Transmembrane region	No results	None
59	WP_020451906.1	No results	No results	No results	No results	No results	No results	No results	None
60	WP_095291354.1	No results	No results	No results	No results	No results	Transmembrane region		None
61	WP_023857771.1	No results	No results	No results	No results	No results	Transmembrane region	PQQ-dependent dehydrogenases and related proteins	None
62	WP_105980883.1	No results	No results	No results	No results	No results	Transmembrane region	No results	None
63	WP_020451116.1	No results	No results	No results	EB1 dimerisation domain-like	No results	No results	No results	None
64	WP_023855265.1	No results	No results	No results	No results	No results	No results	No results	None
65	WP_003183993.1	No results	No results	No results	Transcriptional factor domain	No results	No results	No results	None
66	WP_020452567.1	No results	No results	No results	No results	No results	No results	No results	None
67	WP_026579058.1	No results	No results	No results	No results	No results	No results	No results	None
68	WP_003180439.1	No results	Spore germination protein GerPD, predicted	No results	No results	No results	No results	Spore germination protein gerPA/gerPF;	None
69	WP_020451131.1	No results	No results	No results	No results	No results	No results	No results	None
70	WP_003182837.1	No results	No results	No results	Tropomyosin	No results	No results	No results	None
71	WP_095290960.1	No results	No results	RNA polymerase sigma factor (1.10.10.10/FF/197)	Sigma3 and sigma4 domains of RNA polymerase sigma factors	No results	No results	RNA polymerase sporulation sigma factor SigK;	RNA polymerase sporulation sigma factor SigK
72	WP_050821090.1	No results	No results	No results	No results	No results	No results	No results	None
73	WP_003179806.1	No results	No results	No results	No results	No results	No results	No results	None
74	WP_026579962.1	YhzD	YhzD-like protein	No results	No results	No results	No results	YhzD-like protein	YhzD-like protein (functionally uncharacterized)
75	WP_105980949.1	No results	No results	No results	No results	No results	No results	No results	None
76	WP_023856963.1	No results	No results	No results	No results	No results	No results	No results	None
77	WP_020450116.1	No results	No results	No results	MFS general substrate transporter	No results	Transmembrane region	No results	None
78	WP_020450431.1	No results	No results	No results	No results	No results	No results	No results	None
79	WP_026579880.1	No results	No results	No results	No results	No results	No results	No results	None
80	WP_020451253.1	No results	No results	No results	No results	No results	No results	No results	None
81	WP_003184678.1	No results	No results	No results	Photosystem II reaction center protein T, PsbT	No results	Transmembrane region	No results	None
82	WP_039072587.1	No results	No results	No results	No results	No results	No results	No results	None
83	WP_016885531.1	No results	No results	No results	RING finger domain, C3HC4	No results	No results	No results	None
84	WP_020452457.1	No results	No results	No results	No results	No results	Transmembrane region		None
85	WP_020452690.1	No results	No results	No results	No results	No results	No results	No results	None
86	WP_234026547.1	No results	No results	No results	No results	No results	No results	No results	None
87	WP_020451168.1	No results	No results	No results	No results	No results	No results	No results	None
88	WP_023857457.1	No results	No results	No results	No results	No results	No results	No results	None
89	WP_020453450.1	No results	No results	No results	No results	No results	Transmembrane region		None
90	WP_003180298.1	No results	No results	No results	No results	No results	No results	No results	None
91	WP_154495611.1	No results	No results	No results	No results	No results	No results	No results	None
92	WP_165973178.1	No results	No results	No results	No results	No results	No results	No results	None
93	WP_105980779.1	No results	No results	No results	No results	No results	Transmembrane region		None
94	WP_234026567.1	No results	No results	No results	No results	No results	No results	No results	None
95	WP_020451719.1	No results	No results	No results	No results	No results	Transmembrane region	No results	None
96	WP_020452772.1	No results	No results	No results	ABC transporter transmembrane region	No results	Transmembrane region	No results	None
97	WP_020452822.1	No results	No results	No results	No results	No results	Transmembrane region	No results	None
98	WP_023857616.1	No results	No results	No results	Staphylocoagulase	No results	No results	No results	None
99	WP_158700708.1	No results	No results	No results	No results	No results	No results	No results	None
100	WP_023856949.1	No results	No results	No results	No results	No results	Transmembrane region	No results	None
101	WP_026578971.1	No results	No results	No results	No results	No results	Transmembrane region	No results	None
102	WP_023856615.1	No results	No results	No results	No results	No results	Transmembrane region	No results	None
103	WP_065643375.1	No results	No results	No results	No results	No results	Transmembrane region	No results	None
104	WP_224146215.1	RapH_N	TPR-like_helical_dom_sf	Response regulator aspartate phosphatase	No results	No results	No results	response regulator aspartate phosphatase H, N terminal;	Response regulator aspartate phosphatase
105	WP_020451793.1	No results	No results	No results	No results	No results	No results	No results	None
106	WP_234026570.1	No results	No results	No results	Trp repressor, TrpR	No results	No results	No results	None
107	WP_023856434.1	No results	No results	No results	No results	No results	No results	No results	None
108	WP_020450662.1	No results	No results	No results	No results	No results	Transmembrane region	No results	None
109	WP_020451502.1	No results	No results	No results	Beta-galactosidase LacA, domain 3	No results	No results	PBP2_NikA_DppA_OppA_like Superfamily	None
110	WP_023855949.1	No results	No results	No results	No results	No results	No results	No results	None
111	WP_095291534.1	YqzH	YqzH-like protein	No results	No results	No results	No results	YqzH-like protein	The YqzH-like protein family (functionally uncharacterized)
112	WP_125897635.1	No results	No results	No results	No results	No results	No results	No results	None
113	WP_003180249.1	No results	No results	No results	No results	No results	Transmembrane region	No results	None
114	WP_035399921.1	No results	No results	No results	No results	No results	No results	No results	None
115	WP_105980662.1	No results	No results	No results	No results	No results	Transmembrane region	No results	None
116	WP_026580457.1	No results	No results	No results	No results	No results	Transmembrane region	No results	None
117	WP_026580535.1	No results	No results	No results	No results	No results	No results	No results	None
118	WP_020450496.1	No results	No results	No results	No results	No results	No results	No results	None
119	WP_223254789.1	No results	No results	No results	Thioltransferase	No results	No results	No results	None
120	WP_025810497.1	No results	No results	No results	No results	No results	No results	No results	None
121	WP_020449908.1	No results	No results	No results	No results	No results	trnasmembrane	No results	None
122	WP_020451497.1	No results	No results	No results	No results	No results	No results	No results	None
123	WP_026579662.1	No results	No results	No results	No results	No results	transmembrane region	No results	None
124	WP_230368259.1	No results	No results	No results	Tetrahydrobiopterin biosynthesis enzymes-like	No results	No results	No results	None
125	WP_020450628.1	No results	No results	No results	Anticodon-binding domain of a subclass of class I aminoacyl-tRNA synthetases	No results	No results	No results	None
126	WP_020450771.1	No results	No results	No results	YfgJ-like	No results	no results	No results	None
127	WP_020451022.1	No results	No results	No results	Troponin coil-coiled subunits	No results	no results	No results	None
128	WP_020451692.1	No results	No results	No results	Prefoldin	No results	no results	No results	None
129	WP_020452227.1	No results	No results	No results	Ribbon-helix-helix	No results	no results	No results	None
130	WP_023856126.1	No results	No results	No results	Cryptochrome/photolyase FAD-binding domain	No results	transmembrane region	No results	None
131	WP_020450130.1	No results	No results	No results	Transcriptional factor domain	No results	no results	No results	None
132	WP_228119622.1	No results	No results	No results	No results	No results	no results	No results	None
133	WP_020452508.1	No results	No results	No results	No results	No results	No results	No results	None
134	WP_025811974.1	No results	No results	No results	No results	No results	transmembrane region	No results	None
135	WP_026580162.1	No results	No results	No results	No results	No results	No results	No results	None
136	WP_023856150.1	No results	No results	No results	No results	No results	no results	No results	None
137	WP_048350210.1	No results	No results	No results	No results	No results	transmembrane region	No results	None
138	WP_105980953.1	No results	No results	No results	No results	No results	No results	No results	None
139	WP_234026545.1	No results	Class_I_gatase-like	No results	No results	No results	No results	Type 1 glutamine amidotransferase (GATase1)-like domain	None
140	WP_095292663.1	No results	No results	No results	delta-Endotoxin (insectocide), N-terminal domain	No results	Transmembrane region	No results	None
141	WP_020450928.1	No results	No results	No results	No results	No results	No results	No results	None
142	WP_020451230.1	No results	No results	No results	No results	No results	transmembrane region	No results	None
143	WP_003179940.1	YgaB	YgaB-like protein	No results	No results	No results	No results	YgaB-like protein	The YgaB-like protein family (functionally uncharacterized)
144	WP_020450117.1	No results	No results	No results	No results	No results	transmembrane region	No results	None
145	WP_128822602.1	No results	No results	No results	No results	No results	transmembrane region	No results	None
146	WP_035337816.1	No results	No results	No results	No results	No results	No results	No results	None
147	WP_023857017.1	No results	No results	No results	Gated mechanosensitive channel	No results	No results	No results	None
148	WP_020450232.1	No results	No results	No results	N-utilization substance G protein NusG, N-terminal domain	No results	Transmembrane region	No results	None
149	WP_020451531.1	No results	No results	No results	No results	No results	No results	No results	None
150	WP_020451864.1	No results	No results	No results	Rubredoxin	No results	No results	No results	None
151	WP_023856221.1	No results	No results	No results	No results	No results	No results	No results	None
152	WP_020453451.1	No results	No results	No results	No results	No results	Transmembrane region	No results	None
153	WP_020451839.1	No results	No results	No results	MFS general substrate transporter	No results	Transmembrane region	No results	None
154	WP_020452482.1	No results	No results	No results	No results	No results	no results	No results	None
155	WP_105980652.1	No results	No results	No results	No results	No results	Transmembrane region	No results	None
156	WP_105980763.1	No results	No results	No results	No results	No results	No results	No results	None
157	WP_003180714.1	No results	No results	No results	No results	No results	No results	No results	None
158	WP_105981185.1	No results	No results	No results	No results	No results	No results		None
159	WP_020449960.1	YiaAB	Inner membrane protein YiaA-like YiaAB	No results	No results	No results	transmembrane region	Uncharacterized membrane protein YiaA	Uncharacterized membrane protein YiaAB
160	WP_033155046.1	No results	No results	No results	No results	N-6 Adenine-specific DNA methylases	transmembrane region	No results	None
161	WP_039073125.1	No results	No results	No results	No results	No results	No results	No results	None
162	WP_026580529.1	No results	No results	No results	No results	No results	Transmembrane region	No results	None
163	WP_105980748.1	No results	No results	No results	No results	No results	Transmembrane region	No results	None
164	WP_105981192.1	YqaH	Uncharacterized protein YqaH-like	No results	No results	No results	No results	Uncharacterized protein YqaH	Uncharacterized protein YqaH; a family of unknown function found in Bacillus
165	WP_023856183.1	No results	No results	No results	Heme iron utilization protein-like	No results	No results	No results	None
166	WP_023857054.1	No results	No results	No results	Crambin-like	No results	No results	No results	None
167	WP_023857023.1	No results	No results	No results	Apolipoprotein A-I	No results	No results	No results	None
168	WP_026580364.1	No results	No results	No results	No results	No results	Transmembrane region	No results	None
169	WP_020453622.1	Phage_holin_5_1	Bacteriophage A118-like, holin/antiholin	No results	No results	No results	Transmembrane region	Bacteriophage A118-like holin	Bacteriophage A118-like, holin/antiholin
170	WP_020451229.1	No results	No results	No results	MFS general substrate transporter	No results	Transmembrane region	No results	None
171	WP_105981056.1	No results	No results	No results	No results	No results	Transmembrane region	No results	None
172	WP_020451257.1	No results	No results	No results	No results	No results	Transmembrane region	No results	None
173	WP_026580277.1	No results	No results	No results	No results	No results	No results	No results	None
174	WP_023857365.1	No results	No results	No results	No results	No results	No results	No results	None
175	WP_020450785.1	No results	No results	No results	No results	No results	Transmembrane region	No results	None
176	WP_105980947.1	No results	No results	No results	No results	No results	No results	No results	None
177	WP_039072786.1	No results	No results	No results	No results	No results	Transmembrane region	No results	None
178	WP_023857367.1	No results	No results	No results	No results	No results	Transmembrane region	No results	None
179	WP_020452517.1	No results	No results	No results	No results	No results	Transmembrane region	No results	None
180	WP_158700700.1	No results	No results	No results	No results	No results	No results	No results	None
181	WP_006638778.1	No results	Arc_rbn_hlx_hlx	Antitoxin EndoAI (1.10.1220.10/FF/9)	Omega transcriptional repressor	No results	No results	Metal-responsive transcriptional regulator	Metal-responsive transcriptional regulator
182	WP_020450469.1	No results	No results	No results	FumA C-terminal domain-like	No results	Transmembrane region	No results	None
183	WP_105981191.1	No results	No results	No results	No results	No results	No results	No results	None
184	WP_105980655.1	No results	No results	No results	Putative zinc binding domain	No results	Transmembrane region	No results	None
185	WP_020450376.1	No results	No results	No results	No results	No results	No results	murein hydrolase activator NlpD	None
186	WP_011197680.1	No results	No results	No results	No results	TonB-dependent receptor proteins	Transmembrane region	No results	None
187	WP_003185302.1	No results	No results	No results	No results	No results	No results	No results	None
188	WP_048350642.1	No results	No results	No results	No results	No results	Transmembrane region	No results	None
189	WP_076792973.1	No results	No results	No results	No results	No results	No results	No results	None
190	WP_003180149.1	No results	No results	No results	No results	No results	Transmembrane region	No results	None
191	WP_224066935.1	No results	No results	No results	No results	Lipases, serine active site	Transmembrane region	No results	None
192	WP_020452104.1	No results	No results	No results	No results	No results	Transmembrane region	No results	None
193	WP_003180123.1	Sigma_M_inh	Sigma-M inhibitor YhdK	No results	No results	No results	Transmembrane region	Sigma-M inhibitor protein	Sigma-M inhibitor protein
194	WP_023857019.1	No results	No results	No results	No results	No results	No results	No results	None
195	WP_051303796.1	No results	No results	No results	No results	No results	No results	No results	None
196	WP_026587168.1	No results	No results	No results	No results	No results	No results	No results	None
197	WP_105981206.1	No results	No results	No results	Cyanase C-terminal domain	No results	No results	No results	None
198	WP_020451007.1	No results	No results	No results	No results	No results	No results	No results	None
199	WP_020452196.1	No results	No results	No results	MFS general substrate transporter	No results	Transmembrane region	No results	None
200	WP_025810876.1	No results	No results	No results	No results	No results	No results	Carbohydrate esterase 2 N-termina	None
201	WP_023857706.1	No results	No results	No results	No results	No results	No results	No results	None
202	WP_105980650.1	No results	No results	No results	No results	No results	No results	No results	None
203	WP_105980657.1	No results	No results	No results	Calcium ATPase, transmembrane domain M	No results	transmembrane region	7TMR-DISM_7TM super family	None
204	WP_105980659.1	Putative polysaccharide deacetylase Peptidase_M56 = BlaR1	No results	No results	No results	No results	transmembrane region	No results	None
205	WP_105980661.1	No results	No results	No results	GroEL apical domain-like	No results	low complexity	No results	None
206	WP_043054026.1	No results	No results	No results	No results	No results	transmembrane region	No results	None
207	WP_234026552.1	No results	No results	No results	No results	No results	transmembrane region	No results	None
208	WP_026580443.1	No results	No results	No results	No results	No results	transmembrane region	No results	None
209	WP_023857730.1	No results	No results	No results	PAP/OAS1 substrate-binding domain	No results	transmembrane region	No results	None
210	WP_023857731.1	No results	No results	No results	ABC transporter transmembrane region	No results	transmembrane region	No results	None
211	WP_025810847.1	No results	Streptogramin lyase	Copper resistance D domain protein	NHL repeat	No results	No results	Streptogramin lyase [Defense mechanisms];	1. Streptogramin lyase 2. Copper resistance D domain protein
212	WP_025810827.1	DUF6792 Domain of unknown function (DUF6792)	No results	No results	No results	No results	No results	No results	None
213	WP_020450003.1	No results	No results	No results	OmpH-like	No results	No results	No results	None
214	WP_223254833.1	No results	No results	No results	No results	No results	No results	No results	None
215	WP_105980699.1	No results	MFS transporter	No results	MFS general substrate transporter	No results	transmembrane region	No results	None
216	WP_224066812.1	No results	No results	No results	No results	No results	transmembrane region	No results	None
217	WP_105980700.1	No results	No results	No results	Calcium ATPase, transmembrane domain M	No results	transmembrane region	No results	None
218	WP_105980701.1	No results	No results	No results	No results	No results	No results	No results	None
219	WP_026580557.1	No results	No results	No results	No results	Prokaryotic membrane lipoprotein	No results	No results	None
220	WP_023857878.1	No results	No results	No results	No results	No results	transmembrane region	No results	None
221	WP_105980731.1	No results	No results	No results	No results	No results	transmembrane region	No results	None
222	WP_039073246.1	No results	No results	No results	No results	No results	No results	No results	None
223	WP_105980762.1	No results	No results	No results	YefM-like	No results	No results	No results	None
224	WP_206761178.1	No results	No results	No results		No results	No results	No results	None
225	WP_020450411.1	DPBB_1 = Lytic transglycolase	Rare lipoprotein A (RlpA) contains a conserved region that has the double-psi β-barrel (DPBB) fold	No results	Dipeptidyl peptidase I (cathepsin C), exclusion domain	No results	transmembrane region	LolA_fold-like super family DPBB_RlpA_EXP_N-like super family	RlpA-like domain superfamily
226	WP_020450414.1	No results	No results	No results	Sm motif of small nuclear ribonucleoproteins, SNRNP	No results	transmembrane region	No results	None
227	WP_158700702.1	No results	No results	No results	No results	DM10 domain	transmembrane region	No results	None
228	WP_105980768.1	No results	No results	No results	Glycerol-3-phosphate transporter	No results	transmembrane region	Bac_export_2 super family	None
229	WP_105980784.1	No results	No results	No results	ParB/Sulfiredoxin	No results	No results	ParB_N_Srx super family	None
230	WP_020450498.1	No results	No results	No results	No results	No results	transmembrane region	No results	None
231	WP_020450568.1	No results	No results	No results	Prefoldin	No results	transmembrane region	No results	None
232	WP_105980813.1	No results	No results	No results	GLA-domain	No results	transmembrane region	No results	None
233	WP_026580647.1	No results	No results	No results	No results	No results	No results	No results	None
234	WP_231006255.1	No results	No results	No results	No results	No results	transmembrane region	No results	None
235	WP_025810228.1	No results	No results	No results	No results	No results	transmembrane region	No results	None
236	WP_075213735.1	No results	No results	No results	No results	No results	transmembrane region	No results	None
237	WP_234026559.1	No results	No results	No results	MFS general substrate transporter	No results	transmembrane region	No results	None
238	WP_023856435.1	No results	No results	No results	N-deoxyribosyltransferase	No results	No results	No results	None
239	WP_105980826.1	No results	No results	No results	No results	No results	transmembrane region	No results	None
240	WP_105980827.1	No results	No results	No results	No results	No results	transmembrane region	No results	None
241	WP_105980828.1	No results	No results	No results	Bacterial polysaccharide co-polymerase-like	No results	transmembrane region	No results	None
242	WP_025811868.1	No results	No results	No results	No results	Prokaryotic membrane lipoprotein lipid	transmembrane region	No results	None
243	WP_025811867.1	No results	No results	No results	No results	No results	No results	No results	None
244	WP_105980832.1	No results	Phe-tRNA_synthase-like_B3/B4	No results	PheT/TilS domain	EF-hand calcium-binding domain	No results	B3_4 super family	Phenylalanyl-tRNA synthetase
245	WP_039072542.1	No results	No results	No results	No results	No results	No results	Bactofilin super family	None
246	WP_026580008.1	No results	No results	No results	No results	No results		No results	None
247	WP_051303785.1	No results	No results	No results	No results	No results	transmembrane region	No results	None
248	WP_025811843.1	No results	No results	No results	No results	No results	transmembrane region	No results	None
249	WP_105980834.1	No results	No results	No results	No results	No results	transmembrane region	No results	None
250	WP_025811820.1	DUF6773 = Family of unknown function (DUF6773)	No results	No results	No results	No results	transmembrane region	No results	None
251	WP_020450817.1	No results	No results	No results	No results	No results	transmembrane region	No results	None
252	WP_105980857.1	No results	No results	No results	No results	No results	No results	No results	None
253	WP_026579936.1	No results	No results	No results	No results	No results	transmembrane region	No results	None
254	WP_026579932.1	No results	No results	Cell surface protein (3.40.50.12090/FF/1)	No results	No results	No results	LytB super family	None
255	WP_023856614.1	No results	No results	No results		No results	No results	No results	None
256	WP_020450926.1	No results	AB_hydrolase	No results	alpha/beta-Hydrolases	No results	No results	No results	None
257	WP_105980873.1	No results	No results	No results	NAD(P)-binding Rossmann-fold domains	No results	No results	No results	None
258	WP_009328837.1	Flavoprotein	Flavoprotein Flavin_trans-like	Phosphopantothenoylcysteine decarboxylase	Homo-oligomeric flavin-containing Cys decarboxylases, HFCD	No results	No results	phosphopantothenoylcysteine decarboxylase / phosphopantothenate--cysteine ligase	Homo-oligomeric flavin-containing Cys decarboxylases
259	WP_003180659.1	UPF0738	Uncharacterised protein family UPF0738	No results	No results	No results	No results	No results	None
260	WP_003180698.1	No results	No results	No results	Putative DNA-binding domain	No results	No results	CpxP_like super family	None
261	WP_003180732.1	Pathogenicity locus	Pathogenicity locus	No results	Hemocyanin middle domain	No results	No results	Helix-hairpin-helix domain	Putative mitomycin resistance proteins
262	WP_026579884.1	No results	No results	No results	No results	No results	No results	No results	None
263	WP_023856697.1	No results	No results	No results	No results	No results	No results	No results	None
264	WP_105980889.1	No results	No results	No results	No results	No results	No results	No results	None
265	WP_035338940.1	No results	No results	No results	No results	No results	No results	No results	None
266	WP_026579851.1	No results	No results	No results	No results	No results	No results	No results	None
267	WP_199792123.1	YetA = YetA-like protein	YetA-like protein	No results	Hypothetical protein YteR Terpenoid cyclases/Protein prenyltransferases	Zinc carboxypeptidases, zinc-binding region 2	No results	No results	YetA-like protein (functionally uncharacterized)
268	WP_026579823.1	No results	No results	No results	No results	No results	transmembrane region	No results	None
269	WP_026579821.1	No results	No results	No results	No results	No results	No results	No results	None
270	WP_020451108.1	No results	ESAT-6-like_sf	No results	EsxAB dimer-like	No results	No results	DUF5082 super family	ESAT-6-like superfamily
271	WP_020451113.1	No results	No results	No results	No results	Prokaryotic membrane lipoprotein lipid attachment site	No results	No results	None
272	WP_105980912.1	No results	Uncharacterized membrane protein YkvI	No results	No results	No results	transmembrane region	SLC5-6-like_sbd super family	None
273	WP_020451163.1	No results	No results	No results	No results	No results	No results	No results	None
274	WP_075213209.1	No results	No results	No results	No results	No results	No results	No results	None
275	WP_020451191.1	YetA = YetA-like protein	YkyB-like protein	No results	No results	No results	No results	YkyB-like protein	YkyB-like protein (functionally uncharacterized)
276	WP_020451209.1	No results	No results	No results	beta-sandwich domain of Sec23/24	No results	No results	No results	None
277	WP_020451217.1	No results	No results	No results	Occludin/ELL domain	No results	No results	No results	None
278	WP_105980919.1	No results	No results	No results	No results	No results	transmembrane region	No results	None
279	WP_023857266.1	No results	No results	No results	Oxidoreductase molybdopterin-binding domain	No results	No results	No results	None
280	WP_026579751.1	No results	Transcription regulator DksA-related, predicted	Zinc finger transcriptional regulator, TraR/DksA family	No results	Prokaryotic dksA C4-type zinc finger	No results	zf-dskA_traR super family	Transcription regulator DksA-related
281	WP_234026566.1	No results	No results	No results	No results	No results	No results	No results	None
282	WP_105980946.1	No results	No results	No results	Glucocorticoid receptor-like (DNA-binding domain)	No results	No results	No results	None
283	WP_158700703.1	No results	No results	No results	No results	No results	No results	No results	None
284	WP_105980950.1	No results	No results	No results	No results	No results	No results	No results	None
285	WP_020451469.1	No results	No results	No results	No results	No results	No results	No results	None
286	WP_025811456.1	No results	No results	No results	No results	No results	No results	No results	None
287	WP_020451493.1	No results	No results	No results	No results	No results	No results	No results	None
288	WP_105980957.1	No results	No results	Nucleoside Triphosphate Pyrophosphohydrolase	Nudix	No results	No results	Nudix_Hydrolase super family	Nudix_Hydrolase super family
289	WP_023857630.1	No results	No results	No results	No results	No results	transmembrane region	No results	None
290	WP_023857629.1	No results	No results	No results	No results	No results	No results	No results	None
291	WP_103750441.1	No results	No results	No results	No results	No results	transmembrane region	No results	None
292	WP_105980972.1	No results	No results	No results	No results	No results	No results	No results	None
293	WP_039072731.1	No results	No results	No results	No results	No results	transmembrane region	CdiI_Kp-like super family	None
294	WP_039072733.1	No results	No results	No results	No results	No results	No results	No results	None
295	WP_026579660.1	No results	No results	No results	No results	No results	No results	No results	None
296	WP_026579659.1	No results	No results	No results	No results	No results	No results	No results	None
297	WP_026579657.1	No results	No results	No results	No results	Prokaryotic membrane lipoprotein lipid attachment site	No results	No results	None
298	WP_020451581.1	No results	No results	No results	No results	No results	No results	No results	None
299	WP_026579652.1	No results	Papain-like_cys_pep_sf	No results	Arylamine N-acetyltransferase	No results	No results	No results	None
300	WP_020451608.1	No results	No results	No results	No results	No results	No results	No results	None
301	WP_020451623.1	No results	No results	No results	No results	No results	transmembrane region	No results	None
302	WP_020451626.1	No results	No results	No results	beta-sandwich domain of Sec23/24	No results	No results	No results	None
303	WP_023857538.1	YfzA = YfzA-like protein	YfzA-like protein	No results	No results	No results	transmembrane region	YfzA super family	YhzD-like protein (functionally uncharacterized)
304	WP_079289103.1	No results	No results	No results	No results	No results	transmembrane region	ABC2_membrane super family	None
305	WP_020451763.1	No results	No results	No results	No results	No results	No results	No results	None
306	WP_020451766.1	No results	No results	No results	No results	Prokaryotic membrane lipoprotein lipid attachment site	transmembrane region	No results	None
307	WP_079289251.1	No results	No results	No results	No results	No results	No results	No results	None
308	WP_020451788.1	No results	No results	No results	No results	No results	No results	No results	None
309	WP_031305168.1	No results	No results	No results	No results	No results	No results	No results	None
310	WP_020451848.1	No results	No results	No results	CHU142-like	No results	No results	No results	None
311	WP_020451907.1	No results	No results	No results	No results	No results	No results	No results	None
312	WP_020451908.1	No results	No results	No results	No results	No results	No results	No results	None
313	WP_020451915.1	No results	A-crystallin/Hsp20_dom HSP20-like_chaperone	Small heat shock protein HSP16.5 (2.60.40.790/FF/72)	HSP20-like chaperones	Small heat shock protein (sHSP) domain	No results	Molecular chaperone IbpA, HSP20 family	Heat Shock protein (Hsp20 proteins)
314	WP_224067372.1	No results	No results	No results	No results	No results	No results	No results	None
315	WP_020451965.1	No results	No results	No results	No results	Prokaryotic membrane lipoprotein lipid attachment site	No results	No results	None
316	WP_026579374.1	No results	Predicted membrane protein, Bacillus YphA type	No results	No results	No results	transmembrane region	No results	None
317	WP_020452015.1	No results	No results	No results	GroEL-like chaperone, apical domain	No results	transmembrane region	No results	None
318	WP_026579354.1	No results	No results	No results	No results	No results	No results	No results	None
319	WP_020452052.1	PF01521 Fe-S_biosyn	HesB-like_dom_sf FeS_biogenesis	No results	HesB-like domain	No results	No results	Iron-sulphur cluster biosynthesis	Iron-sulphur cluster biosynthesis
320	WP_023855959.1	No results	No results	No results	No results	No results	No results	No results	None
321	WP_095291176.1	No results	No results	No results	Orange carotenoid protein, N-terminal domain	No results	No results	No results	None
322	WP_020452152.1	No results	No results	No results	No results	No results	transmembrane region	No results	None
323	WP_023855191.1	No results	No results	No results	No results	Prokaryotic N-terminal methylation site	transmembrane region	No results	None
324	WP_105981078.1	No results	No results	No results	DPP6 N-terminal domain-like	Prokaryotic membrane lipoprotein lipid attachment site	No results	No results	None
325	WP_101561082.1	No results	No results	No results	No results	No results	No results	No results	None
326	WP_011198121.1	No results	No results	No results	Sigma3 and sigma4 domains of RNA polymerase sigma factors	No results	transmembrane region	No results	None
327	WP_020452199.1	No results	No results	No results	No results	No results	transmembrane region	No results	None
328	WP_023855219.1	No results	No results	No results	No results	No results	transmembrane region	No results	None
329	WP_026579290.1	YqfQ-like protein	YqfQ-like protein	No results	No results	Tubulin subunits alpha, beta, and gamma	No results	YqfQ super family	YqfQ-like protein (functionally uncharacterized)
330	WP_224067291.1	No results	No results	No results	ssDNA-binding transcriptional regulator domain	No results	No results	PABP-1234 super family	None
331	WP_023855233.1	No results	No results	No results	No results	No results	No results	No results	None
332	WP_105981089.1	No results	Membrane protein YqfB	No results	No results	No results	transmembrane region	No results	None
333	WP_023855267.1	No results	No results	No results	No results	No results	No results	No results	None
334	WP_026579257.1	No results	No results	No results	No results	No results	transmembrane region	No results	None
335	WP_023855269.1	No results	No results	No results	No results	No results	transmembrane region	No results	None
336	WP_234026541.1	No results	No results	No results	No results	No results	No results	No results	None
337	WP_234026542.1	No results	No results	No results	Bacterial immunoglobulin/albumin-binding domains	No results	transmembrane region	YvbJ super family	None
338	WP_234026543.1	No results	No results	No results	No results	No results	No results	No results	None
339	WP_020452350.1	No results	No results	No results	No results	No results	transmembrane region	No results	None
340	WP_026579215.1	No results	No results	No results	No results	No results	No results	No results	None
341	WP_020452371.1	No results	RmlC-like_jellyroll RmlC_Cupin_sf	Gentisate 1,2-dioxygenase (2.60.120.10/FF/274)	RmlC-like cupins	No results	No results	cupin_RmlC-like super family	RmlC-like cupin superfamily
342	WP_023855405.1	No results	No results	No results	OmpH-like	No results	No results	No results	None
343	WP_035338224.1	No results	No results	No results	No results	No results	transmembrane region	No results	None
344	WP_031304790.1	No results	No results	No results	No results	No results	transmembrane region	No results	None
345	WP_023855473.1	No results	No results	No results	No results	No results	transmembrane region	No results	None
346	WP_020452544.1	No results	No results	No results	Activator of Hsp90 ATPase, Aha1	No results	No results	No results	None
347	WP_020452566.1	No results	No results	No results	No results	No results	transmembrane region	No results	None
348	WP_020452597.1	No results	No results	No results	Cloacin translocation domain	No results	transmembrane region	No results	None
349	WP_234026546.1	No results	No results	rRNA (Adenosine-2'-O-)-methyltransferase,putative	Influenza hemagglutinin (stalk)	No results	No results	chromosome segregation protein SMC	Could not be determined (hypothetical protein)
350	WP_026579059.1	No results	Pullulanase	No results	No results	No results	No results	No results	None
351	WP_103750243.1	No results	No results	No results	No results	No results	transmembrane region	No results	None
352	WP_023855527.1	Response regulator aspartate phosphatase H, N terminal	TPR-like_helical_dom_sf TPR_repeat	Rap phosphatase (1.25.40.10/FF/4085)	Tetratricopeptide repeat	TPR repeat region	Tetratricopeptide repeats	response regulator aspartate phosphatase	Tetratricopeptide-like helical domain superfamily (Response regulator aspartate phosphatase)
353	WP_059231740.1	No results	No results	No results	No results	Prokaryotic membrane lipoprotein lipid attachment site	No results	No results	None
354	WP_105981156.1	No results	No results	No results	Tropomyosin	No results	transmembrane region	Smc super family	None
355	WP_020452678.1	No results	No results	No results	HSP33 redox switch-like	Glycosyl hydrolases family 1 active site	No results	No results	None
356	WP_105981168.1	No results	No results	No results	No results	No results	No results	No results	None
357	WP_075212930.1	No results	No results	No results	No results	No results	No results	No results	None
358	WP_003184717.1	No results	No results	No results	Hyaluronidase post-catalytic domain-like	No results	No results	No results	None
359	WP_023856112.1	No results	No results	No results	Variable surface antigen VlsE	No results	No results	No results	None
360	WP_023856115.1	No results	No results	No results	No results	No results	No results	No results	None
361	WP_016886100.1	No results	No results	No results	No results	Ribosomal protein L29	transmembrane region	No results	None
362	WP_095240270.1	No results	No results	No results	No results	Prokaryotic membrane lipoprotein lipid attachment site	No results	flavocytochrome c;	None
363	WP_105979937.1	No results	No results	No results	No results	No results	No results	No results	None
364	WP_080627007.1	No results	No results	No results	No results	No results	No results	No results	None
365	WP_105979929.1	No results	No results	No results	Tetracyclin repressor-like, C-terminal domain	No results	No results	No results	None
366	WP_020450347.1	No results	No results	No results		No results	transmembrane region	No results	None
367	WP_020450346.1	No results	No results	No results	No results	No results	transmembrane region	No results	None
368	WP_105981186.1	Putative phage metallopeptidase	Put_Metallopep	No results	Periplasmic binding protein-like II	No results	No results	Putative phage metallopeptidase	Putative phage metallopeptidase
369	WP_105981189.1	No results	No results	No results	No results	No results	transmembrane region	TubC_N super family	None
370	WP_095323676.1	No results	No results	No results	No results	No results	No results	No results	None
371	WP_105981199.1	PGAP1 = PGAP1-like protein	AB_hydrolase PGAP1-like	Lipase 2 (3.40.50.1820/FF/308)	Bacterial lipase alpha/beta-Hydrolases	No results	No results	alpha/beta hydrolases	Alpha/Beta hydrolase
372	WP_023856164.1	No results	No results	No results	No results	No results	transmembrane region	No results	None
373	WP_065643725.1	No results	No results	No results	No results	No results	transmembrane region	No results	None
374	WP_023856206.1	No results	No results	No results	No results	No results	transmembrane region	No results	None
375	WP_224146402.1	No results	No results	No results	No results	No results	transmembrane region	No results	None
376	WP_158700707.1	No results	No results	No results	No results	No results	No results	No results	None
377	WP_023856311.1	No results	Uncharacterised conserved protein UCP019853	No results	No results	No results	No results	No results	None
378	WP_020452999.1	No results	No results	No results	MFS general substrate transporter	No results	transmembrane region	No results	None
379	WP_105981243.1	No results	No results	No results	No results	No results	No results	No results	None
380	WP_003185659.1	SwrA = Swarming motility protein	Swarming motility protein SwrA	No results	Cna protein B-type domain	No results	No results	Swarming motility protein	Swarming motility protein SwrA
381	WP_020453101.1	No results	No results	No results	No results	No results	No results	No results	None
382	WP_026580170.1	No results	No results	No results	No results	No results	No results	No results	None
383	WP_105981256.1	No results	No results	No results	ADP-ribosylation	No results	No results	No results	None
384	WP_035337789.1	No results	No results	No results	No results	No results	transmembrane region	No results	None
385	WP_026580185.1	No results	No results	No results	No results	Prokaryotic membrane lipoprotein lipid attachment site	No results	No results	None
386	WP_026580209.1	No results	No results	No results	No results	Peroxidases proximal heme-ligand	transmembrane region	No results	None
387	WP_023857133.1	No results	No results	No results	No results	No results	No results	No results	None
388	WP_103749405.1	No results	No results	No results	No results	No results	transmembrane region	No results	None
389	WP_023857096.1	No results	No results	No results	No results	No results	transmembrane region	No results	None
390	WP_023857076.1	No results	Acyl_CoA_acyltransferase	No results	Acyl-CoA N-acyltransferases (Nat)	No results	No results	N-Acyltransferase superfamily	Acyl-CoA N-acyltransferase
391	WP_023856950.1	BslA Biofilm surface layer A	YuaB-like	Biofilm-surface layer protein A	No results	No results	No results	BslA_like super family	BslA Biofilm surface layer A
392	WP_026580310.1	No results	No results	No results	No results	No results	transmembrane region	No results	None
393	WP_155121659.1	No results	No results	No results	No results	No results	transmembrane region	No results	None
394	WP_020453459.1	No results	No results	No results	No results	No results	No results	No results	None
395	WP_025810569.1	No results	No results	No results	No results	No results	transmembrane region	No results	None
396	WP_105981311.1	No results	No results	No results	TM0957-like	Prokaryotic membrane lipoprotein lipid attachment site Flavodoxin	No results	No results	None
397	WP_020453490.1	No results	No results	No results	No results	No results	No results	No results	None
398	WP_105981317.1	No results	No results	No results	No results	No results	No results	No results	None
399	WP_095291275.1	No results	No results	No results	No results	No results	No results	No results	None
400	WP_026580354.1	YxiJ = YxiJ-like protein	Immunity protein WapI-like	No results	Ligand-binding domain in the NO signalling and Golgi transport	No results	No results	YxiJ super family	1. Immunity protein WapI-like 2. YxiJ super family
401	WP_229129193.1	No results	No results	No results	No results	No results	No results	No results	None
402	WP_026580356.1	No results	No results	No results	No results	No results	No results	No results	None
403	WP_051967027.1	No results	No results	No results	No results	No results	No results	No results	None
404	WP_096748407.1	No results	No results	No results	Fumarate reductase/Succinate dehydogenase iron-sulfur protein, C-terminal domain	No results	No results	No results	None
405	WP_026580359.1	No results	No results	No results	No results	No results	No results	No results	None
406	WP_234026551.1	No results	No results	No results	No results	No results	transmembrane region	No results	None
407	WP_105981320.1	No results	No results	No results	No results	No results	No results	No results	None
408	WP_105981321.1	No results	No results	No results	PhoU-like	No results	No results	No results	None
409	WP_023856884.1	No results	6-hairpin_glycosidase_sf	Glycosyl hydrolase, family 8	Six-hairpin glycosidases	Prokaryotic membrane lipoprotein lipid attachment site	No results	No results	1. Six-hairpin glycosidase superfamily 2. Membrane lipoprotein
410	WP_020453535.1	PDT = Prephenate dehydratase	Preph_deHydtase	No results	Phosphate binding protein-like	No results	No results	Prephenate dehydratase	Prephenate dehydratase (Amino acid transport and metabolism]
411	WP_020453557.1	No results	No results	No results	S-adenosyl-L-methionine-dependent methyltransferases	No results	No results	No results	None
412	WP_026580384.1	No results	No results	No results	No results	No results	transmembrane region	No results	None
413	WP_105981339.1	No results	No results	No results	X-Prolyl dipeptidyl aminopeptidase PepX, N-terminal domain	No results	No results	No results	None
414	WP_020453614.1	No results	No results	No results	No results	No results	transmembrane region	No results	None
