# Supplementary material for: In silico functional annotation of hypothetical proteins from the Bacillus paralicheniformis strain Bac84 reveals proteins with biotechnological potentials and adaptational functions to extreme environments
Source: PLoS One. 2022 Oct 13;17(10):e0276085. doi: 10.1371/journal.pone.0276085 (PMC9560612; doi:10.1371/journal.pone.0276085)
Supplement: S8 Table — (XLSX) [file pone.0276085.s013.xlsx]

## Sheet: Properties
Supplementary Table S8 : List of predicted physicochemical parameters, sub-cellular localization and prediction of transmembrane helices for the selected 37 HPs.
											Sub-cellular localization		Transmembrane helice			Signal Peptide
No.	HPs ID	Protein length (AA)	MW	pI	R+	R-	EC	II	AI	GRAVY	PSORT B	CELLO	SOSUI	HMMTOP	TMHMM
1	WP_158700706.1	45	4689.57	6.51	5	5	0	17.54	114.67	0.587	Unknown	Cytoplasmic	Soluble	0	0	No
2	WP_230368348.1	52	5990.62	4.4	12	4	4470	71.66	90.19	-0.363	Cytoplasmic	Cytoplasmic	Soluble	0	0	No
3	WP_095290960.1	60	7146.72	10.48	8	19	1490	45.19	71.67	-0.833	Cytoplasmic	Cytoplasmic/extracellular	Soluble	0	0	No
4	WP_026579962.1	61	7074.92	5.52	12	9	2980	15.56	67.05	-0.718	Cytoplasmic	Cytoplasmic	Soluble	0	0	No
5	WP_224146215.1	69	8284.53	6.16	9	9	9970	43.83	97.54	-0.549	Unknown	Extracellular/Cytoplasmic	Soluble	0	0	No
6	WP_095291534.1	70	8062.18	4.85	13	8	4470	79.45	90.57	-0.559	Cytoplasmic	Cytoplasmic	Soluble	0	0	No
7	WP_003179940.1	81	9608.12	4.97	15	12	2980	56.33	102.47	-0.602	Cytoplasmic	Cytoplasmic	Soluble	0	0	No
8	WP_020449960.1	86	9810.16	6.56	9	9	5960	49.47	88.49	-0.162	Cytoplasmic/Membrane	Cytoplasmic/Membrane /Extracellular	Membrane, 2 TM helix	2	2	No
9	WP_105981192.1	88	9964.44	6.28	14	13	125	31.3	93.18	-0.284	Cytoplasmic	Cytoplasmic	Soluble	0	0	No
10	WP_020453622.1	88	9499.55	10.09	5	11	6990	27.57	142.95	0.692	Cytoplasmic/Membrane	Membrane	Membrane, 3 TM helix	3	3	No
11	WP_006638778.1	93	10649	5.02	15	12	5960	64.68	81.83	-0.573	Unknown	Cytoplasmic	Soluble	0	0	No
12	WP_003180123.1	96	10605.9	7.91	5	6	13980	26.44	145.1	1.177	Cytoplasmic/Membrane	Membrane	Membrane, 3 TM helix	3	3	No
13	WP_025810847.1	295	31387.2	4.64	34	19	59025	36.8	74.88	-0.217	Cytoplasmic	Cytoplasmic	Soluble	0	0	No
14	WP_020450411.1	126	13741.3	10.23	6	25	21430	13.32	75.08	-0.161	Unknown	Extracellular	Membrane, 1 TM helix	1	1	YES
15	WP_105980832.1	209	23743.1	5.42	31	24	12950	58.07	90.1	-0.289	Cytoplasmic	Cytoplasmic	Soluble	0	0	No
16	WP_009328837.1	185	20327.5	5.43	20	17	12950	26.12	109.62	0.065	Cytoplasmic	Membrane	Soluble	0	0	No
17	WP_003180732.1	151	17333.9	8.97	20	25	35660	35.16	71.85	-0.652	Cytoplasmic	Cytoplasmic	Soluble	0	0	No
18	WP_199792123.1	863	97760.3	6.16	114	101	228440	38.33	76.13	-0.399	Cytoplasmic/Membrane	Cytoplasmic	Soluble	0	0	No
19	WP_020451108.1	104	12265.9	5.08	22	17	12950	57	100.48	-0.688	Cytoplasmic	Cytoplasmic	Soluble	1	0	No
20	WP_020451191.1	153	17573.4	10.03	11	27	10430	27.39	75.23	-0.778	Cytoplasmic	Cytoplasmic	Soluble	0	0	No
21	WP_026579751.1	121	14098.9	4.59	19	9	14440	41.16	86.36	-0.402	Unknown	Cytoplasmic	Soluble	0	0	No
22	WP_105980957.1	205	23173.3	4.8	41	25	15470	41.44	95.51	-0.348	Cytoplasmic	Cytoplasmic	Soluble	1	0	No
23	WP_023857538.1	104	12217.2	9.4	7	10	22460	46.77	92.69	0.248	Cytoplasmic/Membrane	Membrane	Membrane, 2 TM helix	3	2	No
24	WP_020451915.1	139	16075	5.36	22	16	9970	56.01	77.12	-0.705	Unknown	Cytoplasmic/Membrane	Soluble	0	0	No
25	WP_020452052.1	107	11844.7	4.85	13	10	13075	54.29	90.28	-0.132	Cytoplasmic	Cytoplasmic	Soluble	0	0	No
26	WP_026579290.1	216	22982.2	10.21	17	30	2980	54.97	55.19	-0.873	Unknown	Membrane	Soluble	1	0	No
27	WP_020452371.1	314	34701	5.72	37	26	42860	40.49	83.41	-0.28	Cytoplasmic	Cytoplasmic	Soluble	0	0	No
28	WP_234026546.1	191	22553.4	5	46	38	1490	35.82	87.8	-0.761	Cytoplasmic	Cytoplasmic	Soluble	0	0	No
29	WP_023855527.1	372	44017.5	6.35	57	53	54460	44.55	82.2	-0.494	Cytoplasmic	Cytoplasmic	Soluble	0	0	No
30	WP_105981186.1	171	20108.4	5.1	35	21	39085	41.33	63.33	-0.761	Cytoplasmic	Cytoplasmic	Soluble	0	0	No
31	WP_105981199.1	487	53555.7	9.07	47	54	67840	26.86	79.16	-0.341	Unknown	Membrane	Soluble	1	0	Yes
32	WP_003185659.1	117	13751.8	5.67	17	15	15930	48.1	100.68	-0.244	Unknown	Cytoplasmic	Soluble	0	0	No
33	WP_023857076.1	147	16375.9	5.1	22	16	3105	49.46	90.88	-0.122	Cytoplasmic	Cytoplasmic	Soluble	0	0	No
34	WP_023856950.1	157	17688.1	9.6	13	18	14440	29.17	77.01	-0.238	Unknown	Extracellular	Membrane, 1 TM helix	1	0	Yes
35	WP_026580354.1	117	13725.8	9.16	16	20	11920	47.84	74.96	-0.651	Unknown	Cytoplasmic	Membrane, 1 TM helix	0	0	No
36	WP_023856884.1	360	40937.2	5	47	31	62925	40.39	89.19	-0.354	Unknown	Cytoplasmic/Membrane /Extracellular	Membrane, 1 TM helix	1	0	Yes
37	WP_020453535.1	188	20438.6	6.43	18	16	10220	26.58	93.94	0.094	Cytoplasmic	Cytoplasmic/Membrane	Soluble	0	0	No
