# Supplementary material for: In silico functional annotation of hypothetical proteins from the Bacillus paralicheniformis strain Bac84 reveals proteins with biotechnological potentials and adaptational functions to extreme environments
Source: PLoS One. 2022 Oct 13;17(10):e0276085. doi: 10.1371/journal.pone.0276085 (PMC9560612; doi:10.1371/journal.pone.0276085)
Supplement: S9 Table — (XLSX) [file pone.0276085.s014.xlsx]

## Sheet: PPI table
Supplementary Table S9 : Protein-protein interactions analyses of the 37 HPs.
							Searched againgst the proteins from Bacillus lichenformies
No.	HP ID	STRING protein	Annotation	Interacted protein	Score		both functional and physical protein associations
1	WP_158700706.1	No resutls	NA	No resutls	NA		Required score was set for 0.700 = High confidence
2	WP_230368348.1	No resutls	NA	No resutls	NA
3	WP_095290960.1	sigK	Sigma factors are initiation factors that promote the attachment of RNA polymerase to specific initiation sites and are then released	Sporulation stage IV protein A; spoIVA (ATPase)	0.93
4	WP_026579962.1	BL02828	annotation not available	ytpI (100 aa) - Uncharacterized protein	0.708
5	WP_224146215.1	No resutls	NA	No resutls	NA
6	WP_095291534.1	No resutls	NA	No resutls	NA
7	WP_003179940.1	ygaB	annotation not available	yozR (150 aa) -Involved in spore germination	0.777
8	WP_020449960.1	No resutls	NA	No resutls	NA
9	WP_105981192.1	yqaH	annotation not available	BL01008 (172 aa) - Uncharacterized protein	0.845
10	WP_020453622.1	No resutls	NA	No resutls	NA
11	WP_006638778.1	endoAI	Transcriptional inhibitor endoAI	endoA (116 aa) - Putative rnase	0.988
12	WP_003180123.1	yhdK	Conserved hypothetical protein	sigM (163 aa) - RNA polymerase sigma factor	0.921
13	WP_025810847.1	vgb	Glucose dehydrogenase protein	BL01863 (741 aa) - Putative formate C-acetyltransferase	0.722
14	WP_020450411.1	ydjM	annotation not available	yoeB (182) - endopeptidase inhibitor	0.713
15	WP_105980832.1	yzhB	annotation not available	yhbA (382 aa) - 4Fe-4S cluster binding putative ferredoxin	0.747
16	WP_009328837.1	yolI	Dna/pantothenate metabolism flavoprotein	yacB (258 aa) - Catalyzes the phosphorylation of pantothenate	0.987			Raca (186 aa); Required for A6:F32
17	WP_003180732.1	No resutls	NA	No resutls	NA
18	WP_199792123.1	yetA	carboxypeptidase A activity	Carbohydrate esterase, Family 12 YesY (214 aa)	0.883
19	WP_020451108.1	BL03737	annotation not available	BL03736 (237 aa) - Uncharacterized protein	0.845
20	WP_020451191.1	ykyB	annotation not available	yhdB (82 aa) - Uncharacterized protein	0.773
21	WP_026579751.1	ylyA	annotation not available	rapI (372 aa) - Uncharacterized protein	0.716
22	WP_105980957.1	ymaB	annotation not available	Nrdi (131 aa); Probably involved in ribonucleotide reductase function	0.771
23	WP_023857538.1	No resutls	NA	No resutls	NA
24	WP_020451915.1	No resutls	NA	No resutls	NA
25	WP_020452052.1	yqkB	Conserved protein yqkb; Belongs to the HesB/IscA family	yqkC (79 aa) - Uncharacterized protein	0.866
26	WP_026579290.1	yqfQ	microtubule-based movement	ylbD (131 aa) - Uncharacterized protein	0.755		NA=NOT APPLICABLE
27	WP_020452371.1	No resutls	NA	No resutls	NA		NG=NOT GIVEN
28	WP_234026546.1	BL00055	annotation not available	Two-component sensor histidine kinase CheA (673 aa)	0.876
29	WP_023855527.1	rapA	Response regulator aspartate phosphatase;	Raca (186 aa); Required for the formation of axial filaments	0.836
30	WP_105981186.1	No resutls	NA	No resutls	NA
31	WP_105981199.1	No resutls	NA	No resutls	NA		NA=NOT APPLICABLE
32	WP_003185659.1	No resutls	NA	No resutls	NA		NG=NOT GIVEN
33	WP_023857076.1	ywlB	annotation not available	argC (345 aa) - N-acetylglutamate gamma-semialdehyde dehydrogenase	0.902
34	WP_023856950.1	No resutls	NA	No resutls	NA
35	WP_026580354.1	No resutls	NA	No resutls	NA
36	WP_023856884.1	ydaJ	annotation not available	ydaM (499 aa) - Uncharacterized protein	0.992
37	WP_020453535.1	ywfB	annotation not available	3-deoxy-D-arabino-heptulosonate 7-phosphate synthase and chorismate mutase-isozyme 3 (358 aa)	0.981
		NA=NOT APPLICABLE
		NG=NOT GIVEN
